# Supplementary material
Source: PubMed Central journal article supplement (PMC6754614)

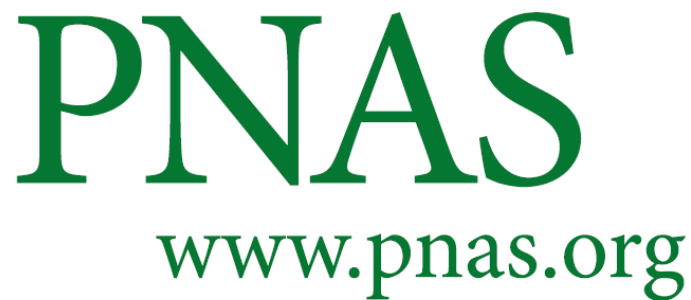

## Supplementary Information for

### **Many human RNA viruses show extraordinarily stringent selective constraints on protein evolution**

Jinn-Jy Lin<sup>1</sup>, Maloyjo Joyraj Bhattacharjee<sup>1</sup>, Chun-Ping Yu<sup>1</sup>, Yan Yuan Tseng<sup>2\*</sup> and Wen-Hsiung Li<sup>1,3\*</sup>

<sup>1</sup>Biodiversity Research Center, Academia Sinica, Taipei 11529, Taiwan

<sup>2</sup>Center for Molecular Medicine and Genetics, School of Medicine, Wayne State University, 540 E. Canfield, Scott Hall 3206 Detroit, MI 48201, USA

<sup>3</sup>Department of Ecology and Evolution, University of Chicago, IL 60637, USA

\*To whom correspondence should be addressed. ytseng@wayne.edu;  
whli@uchicago.edu

#### **This PDF file includes:**

Figs. S1 to S3

#### **Other supplementary materials for this manuscript include the following:**

Datasets S1 to S4

**Fig. S1. Neighbor-Joining tree of the ZIKV strains studied.**

The phylogeny was built based on the multiple nucleotide sequence alignment of the entire protein coding region of the genomes studied. The synonymous distance (dS) was used as the distance metric.

Only bootstrap values > 50 are shown. Each sequence is identified by its accession number in NCBI Genbank, the country from which it was isolated, and the date of isolation.

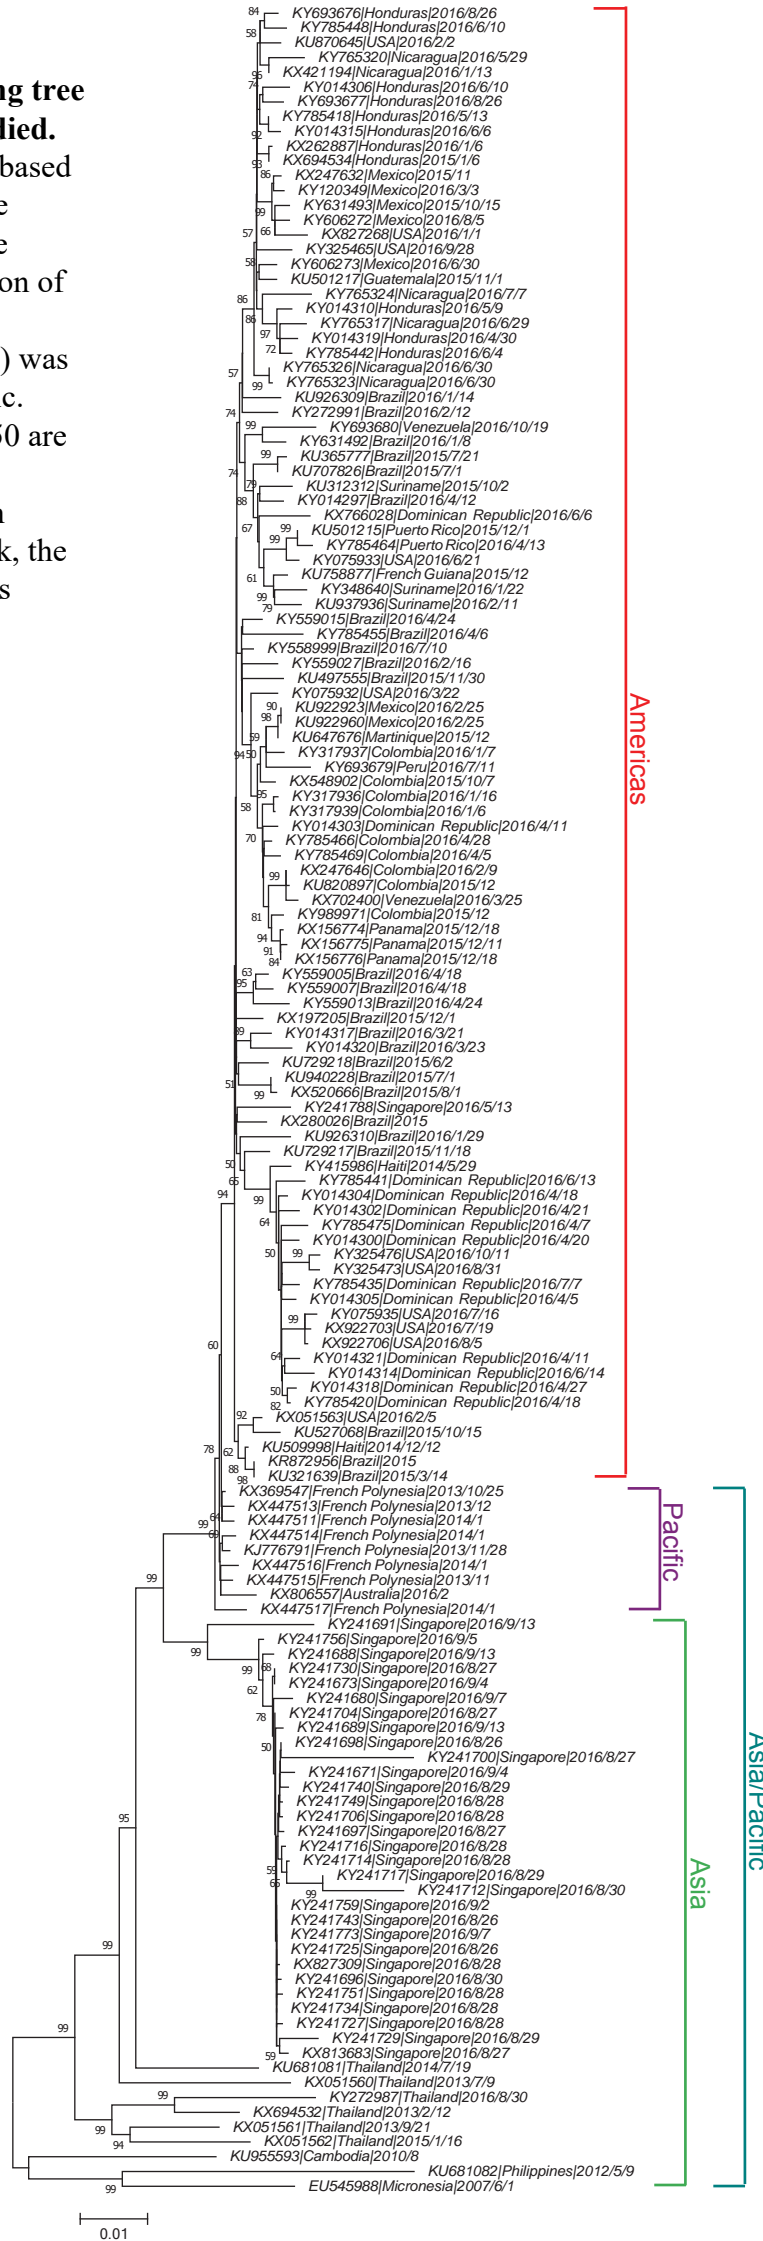

**Fig. S2. Neighbor-Joining tree of the WNV strains studied.**

The phylogeny was built based on the multiple sequence alignment of the entire protein coding region of the genomes studied. The synonymous distance (dS) was used as the distance metric. Only bootstrap values > 50 are shown. Each sequence is identified by the same way as Fig. S1.

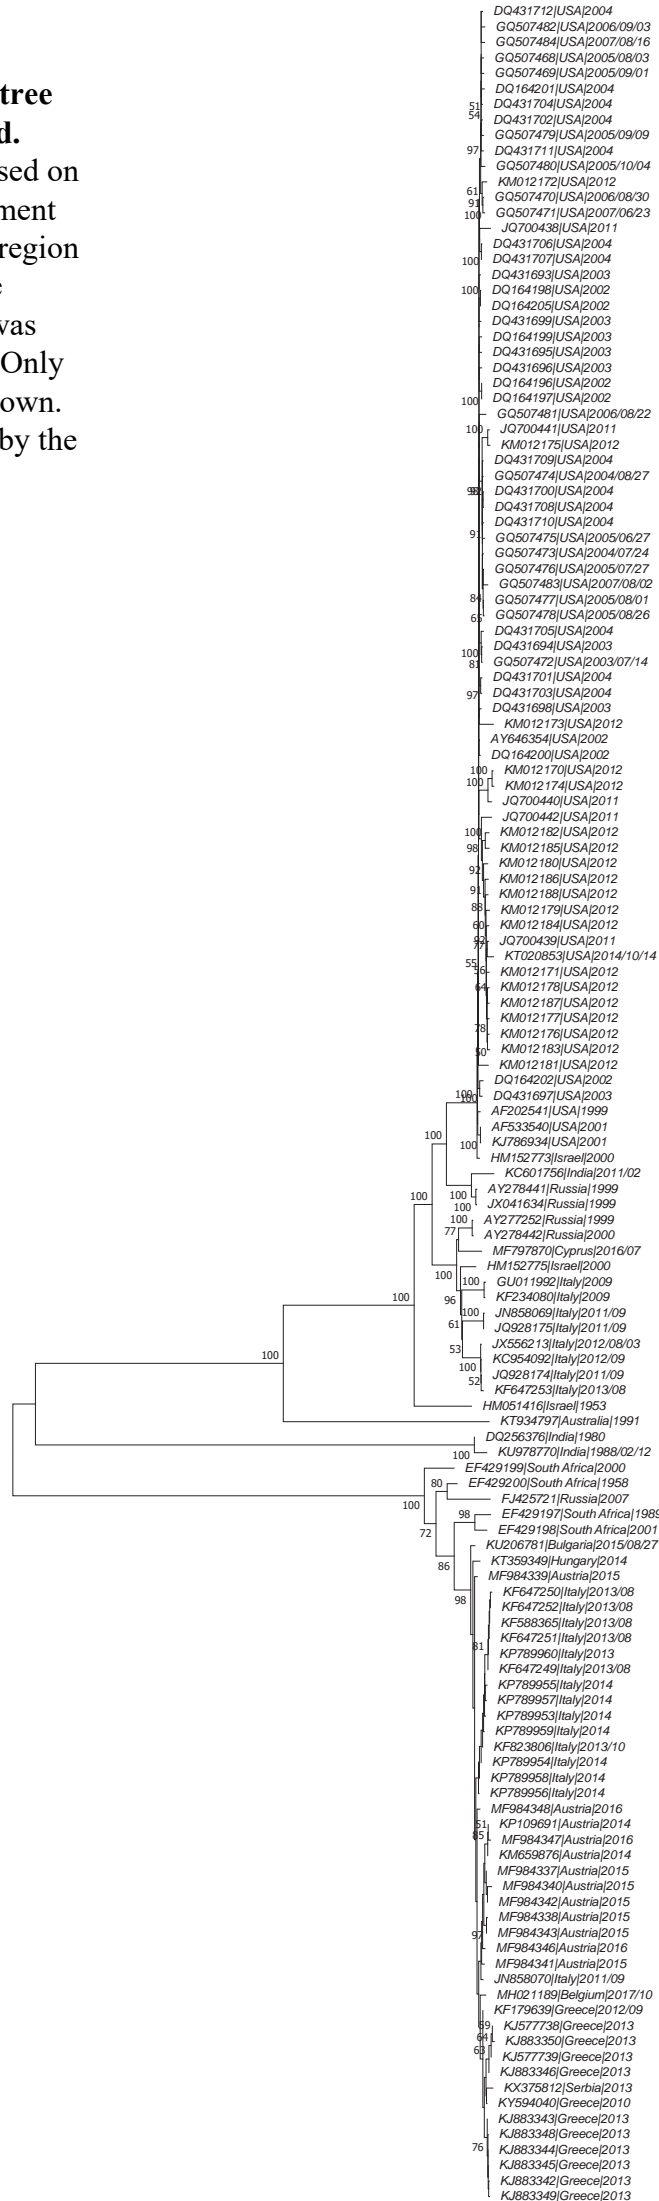

**Fig. S3. Neighbor-Joining tree of the hepatitis E virus strains studied.**

The phylogeny was built based on the multiple sequence alignment of the entire protein coding region of the genomes studied. The synonymous distance (dS) was used as the distance metric. Only bootstrap values > 50 are shown. Each sequence is identified as in Fig. S1.

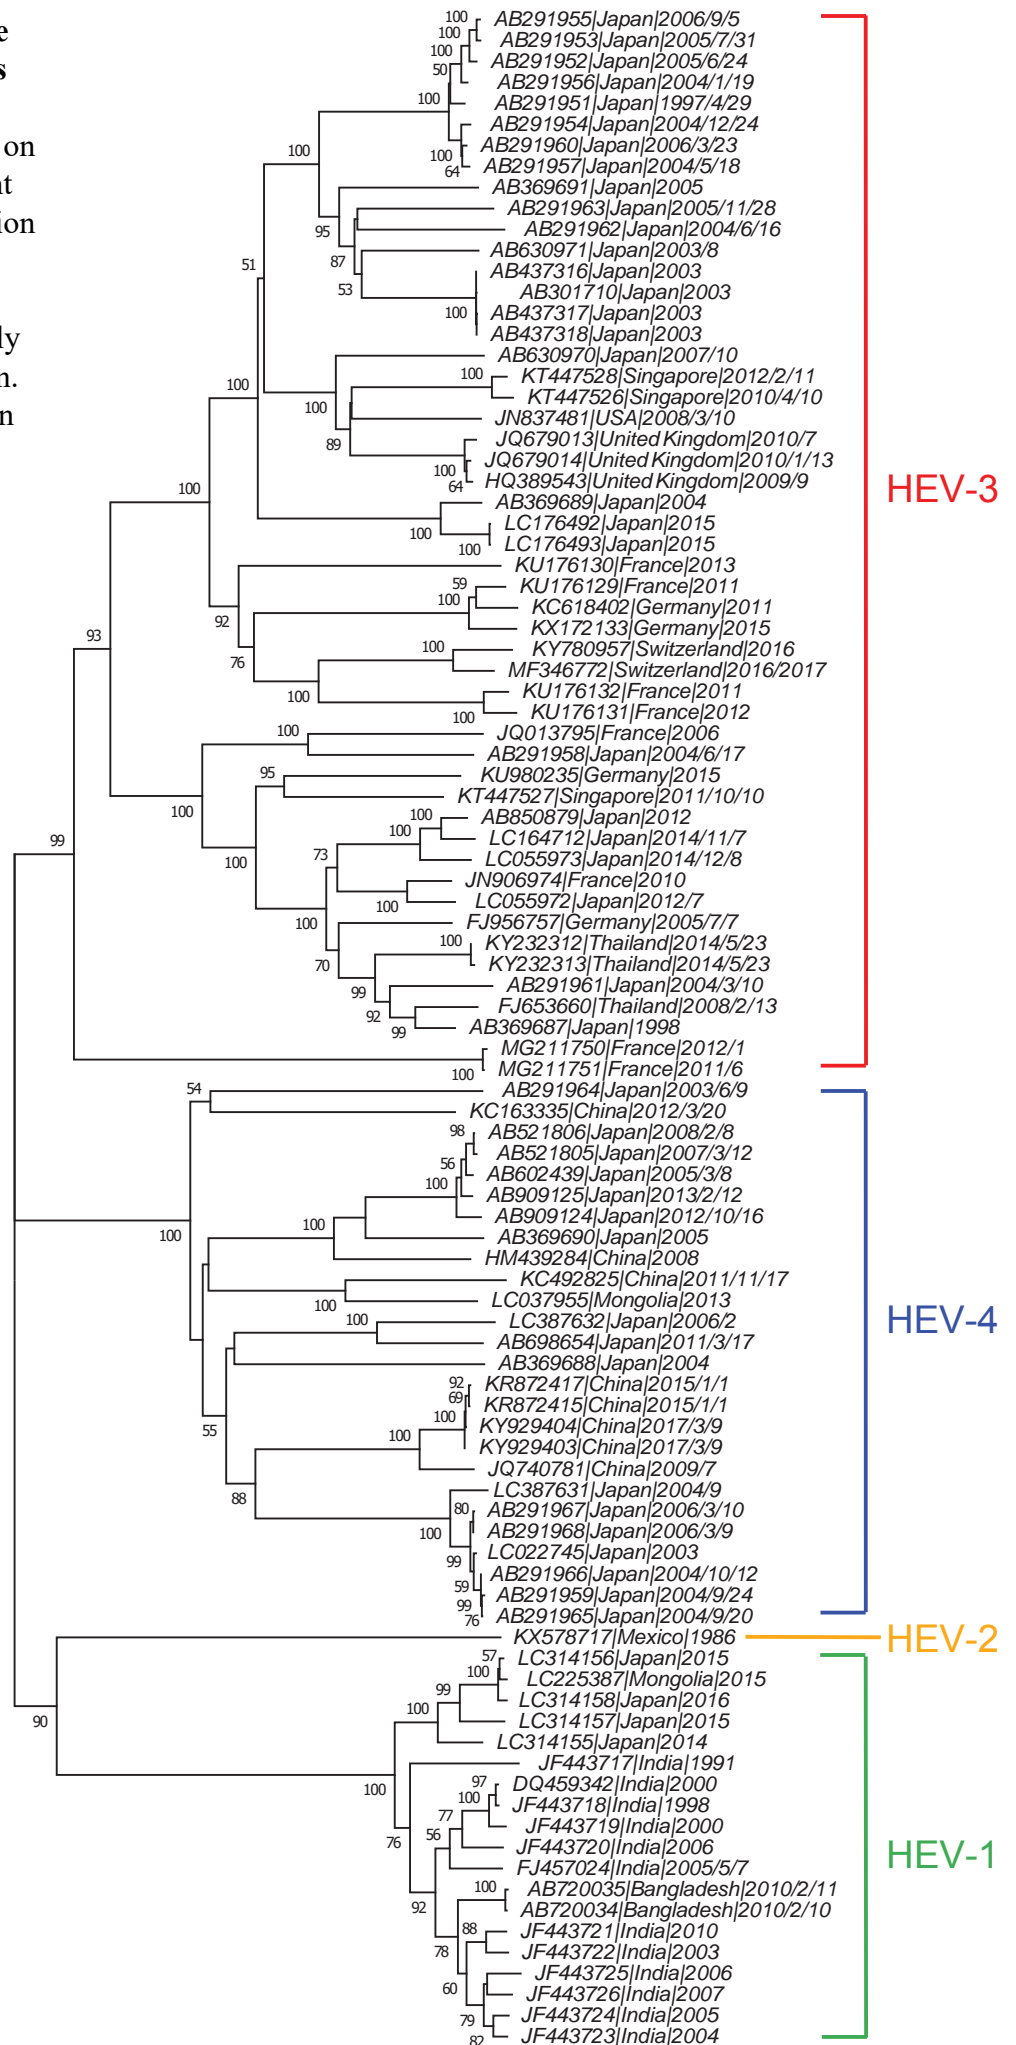

Supplement: pnas.1907626116.sapp.pdf [file pnas.1907626116.sapp.pdf]
